# Supplementary material
Source: publisher figshare collection journal article supplement (https://acs.figshare.com/ndownloader/files/4094161)
Supplement: Supplementary file 1 [file 4094161]

# Tracking the Mechanism of Fibril Assembly by Simulated Two-Dimensional Ultraviolet Spectroscopy

A. R. Lam\*, J. J. Rodriguez, A. Rojas, H. A. Scheraga and S. Mukamel

## Figures Captions

- **Figure S1.** 1D and 2D spectra in the FUV regime for Configuration 2 at different simulation times. **Top:** Linear Absorption (1D). **Middle:** The 2D non-chiral  $xxxx$  spectra. **Bottom:** The 2D non-chiral combination  $xyxy$ - $xyyx$  signal. The non-chiral  $xxxx$  spectra have extended blue peaks at  $52,000\text{ cm}^{-1}$ , while the non-chiral combination  $xyxy$ - $xyyx$  spectra have broader and diffused blue peaks at  $52,000\text{ cm}^{-1}$ . The 2D signal  $S$  in each spectrum of this study is normalized in a color scale to rank the weak (in blue) and strong (in red) peaks, and plotted on a nonlinear scale that interpolates between logarithmic, for small values, and linear for large values, of the signal intensity. The nonlinear scale is defined as  $\text{arcsinh}(cS) = \ln\left(cS + \sqrt{1 + (cS)^2}\right)$  with a fixed value for  $c$  defined by the user.
- **Figure S2.** 1D and 2D chiral signals in the FUV for Configuration 2 at different simulation times. **Top Row:** Representative snapshots (as in Rojas *et al.*<sup>1</sup>) of A  $\beta_{(9-40)}$  monomer (red) interacting with the amyloid template (blue) at different simulation times. Aromatic residues, Tyr and Phe, are colored in orange and green, respectively. **Middle Panels:** circular dichroism. **Bottom Panels:** 2DFUV chiral  $xyxy$  spectra.
- **Figure S3.** Maps A to F show the average chirality factor  $\langle CF(m,n) \rangle$  (defined in Zhuang *et al.*<sup>2</sup>) for  $\pi\pi^*$  transitions for Configuration 2 at different simulation times, indicated at the left of each map. A representative snapshot (obtained from ref. 1) of the A  $\beta_{(9-40)}$  monomer (red) interacting with the amyloid template (blue) for the corresponding time, is also shown at the left of each map. Axes in each map correspond to the amino-acid residue index. To highlight the contribution of a pair of amino-acid residues to the chirality factor, a similar normalization scale as in the 2D signals was used here.
- **Figure S4.** Components of the 2DFUV non-chiral  $xxxx$  signal dissection defined as  $S_{\text{Complex}} = S_{\text{Template}} + S_{\text{Monomer}} + \Delta S$  for Configuration 1 at different simulation times. The signal  $S$  of each component was normalized using the equation described in the caption of Fig. S1. The constant factor  $c$  is displayed in the bottom row.
- **Figure S5.** Same as in Fig. S4 but for Configuration 2.

Figure S1:

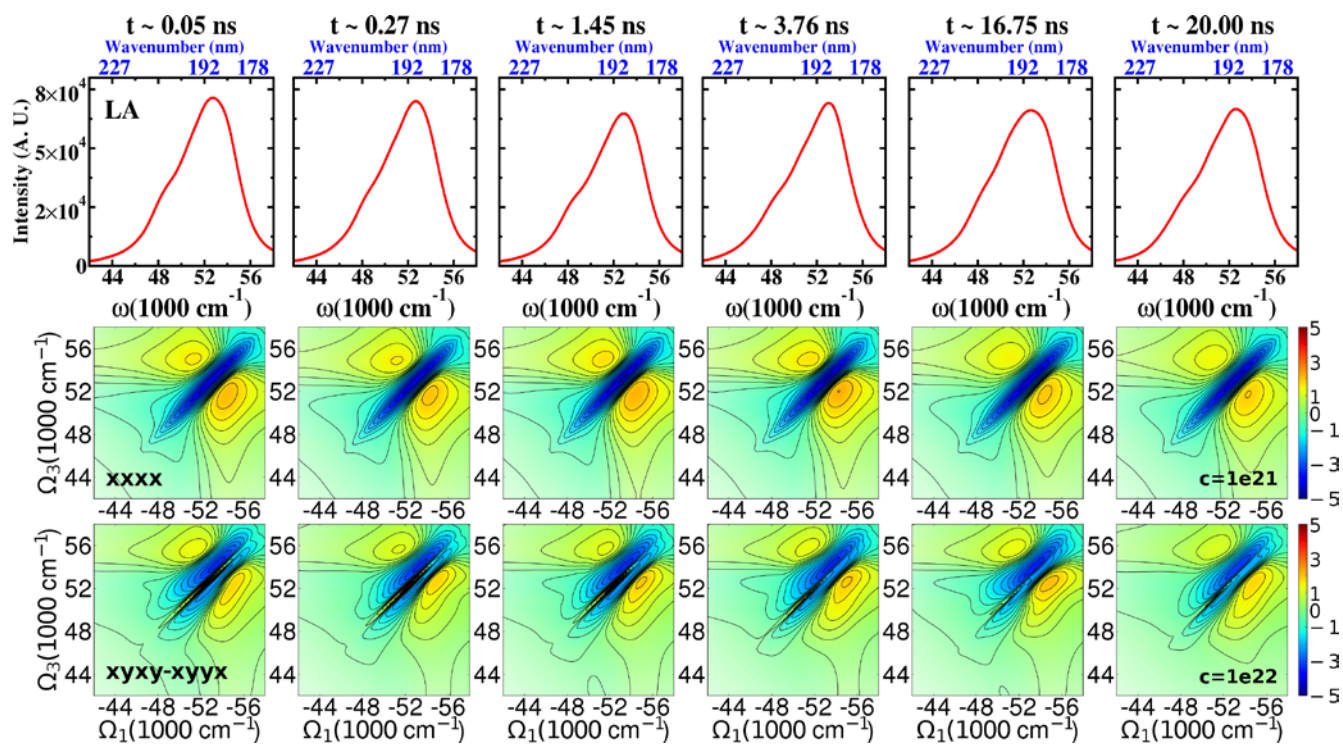

Figure S2:

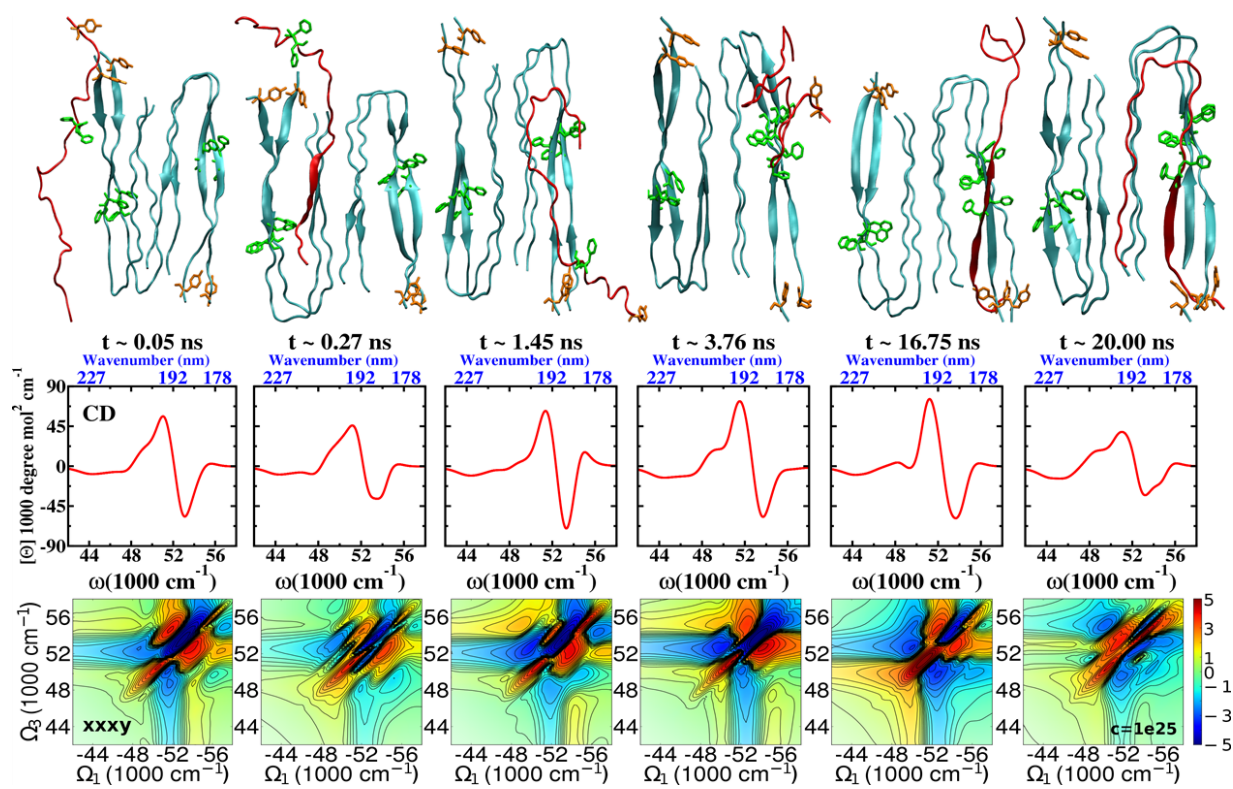

Figure S3:

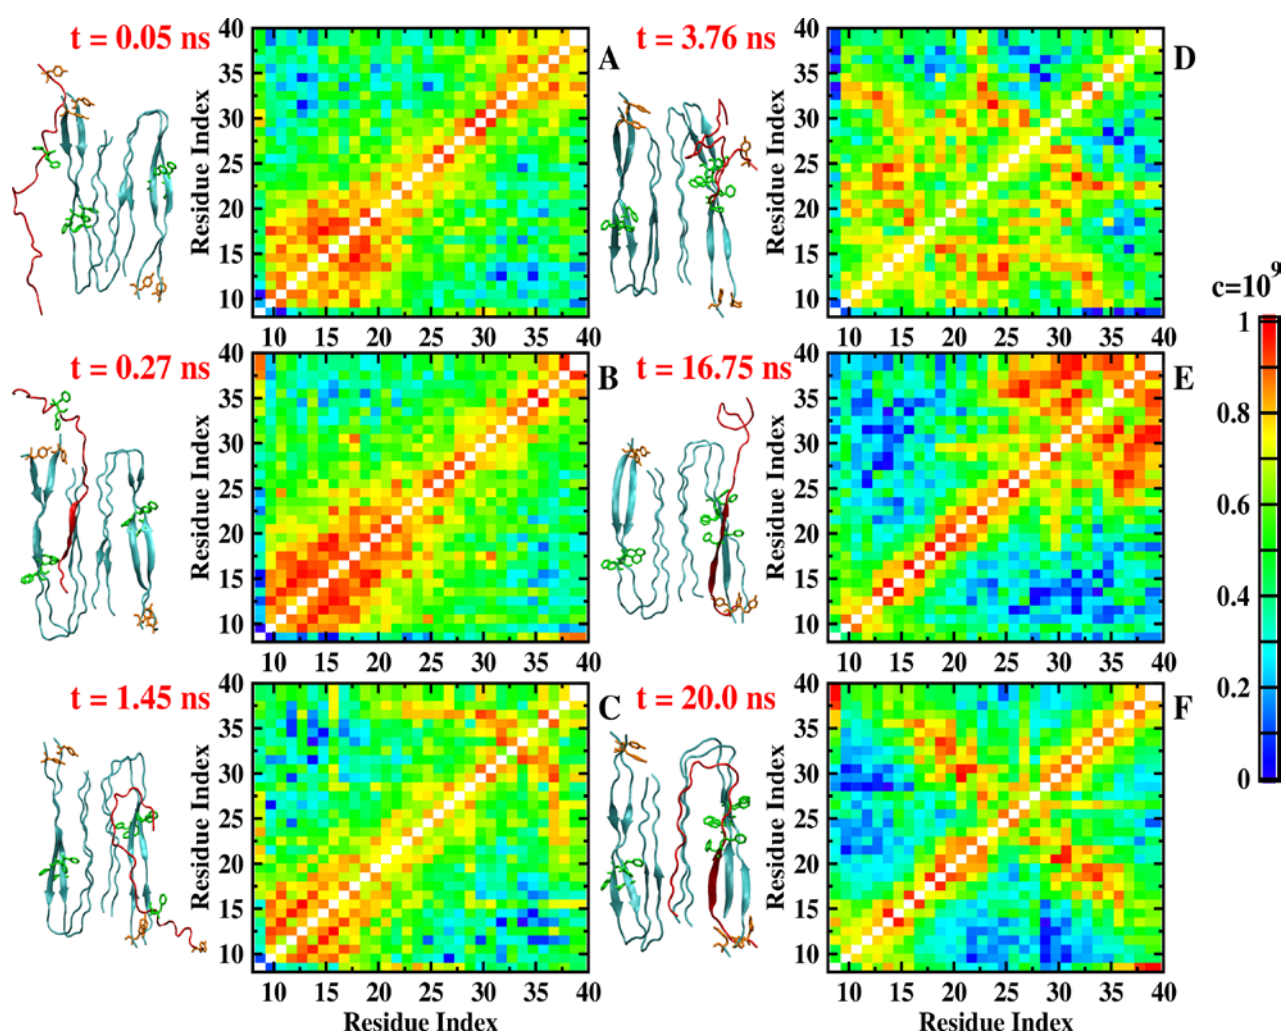



Figure S4:

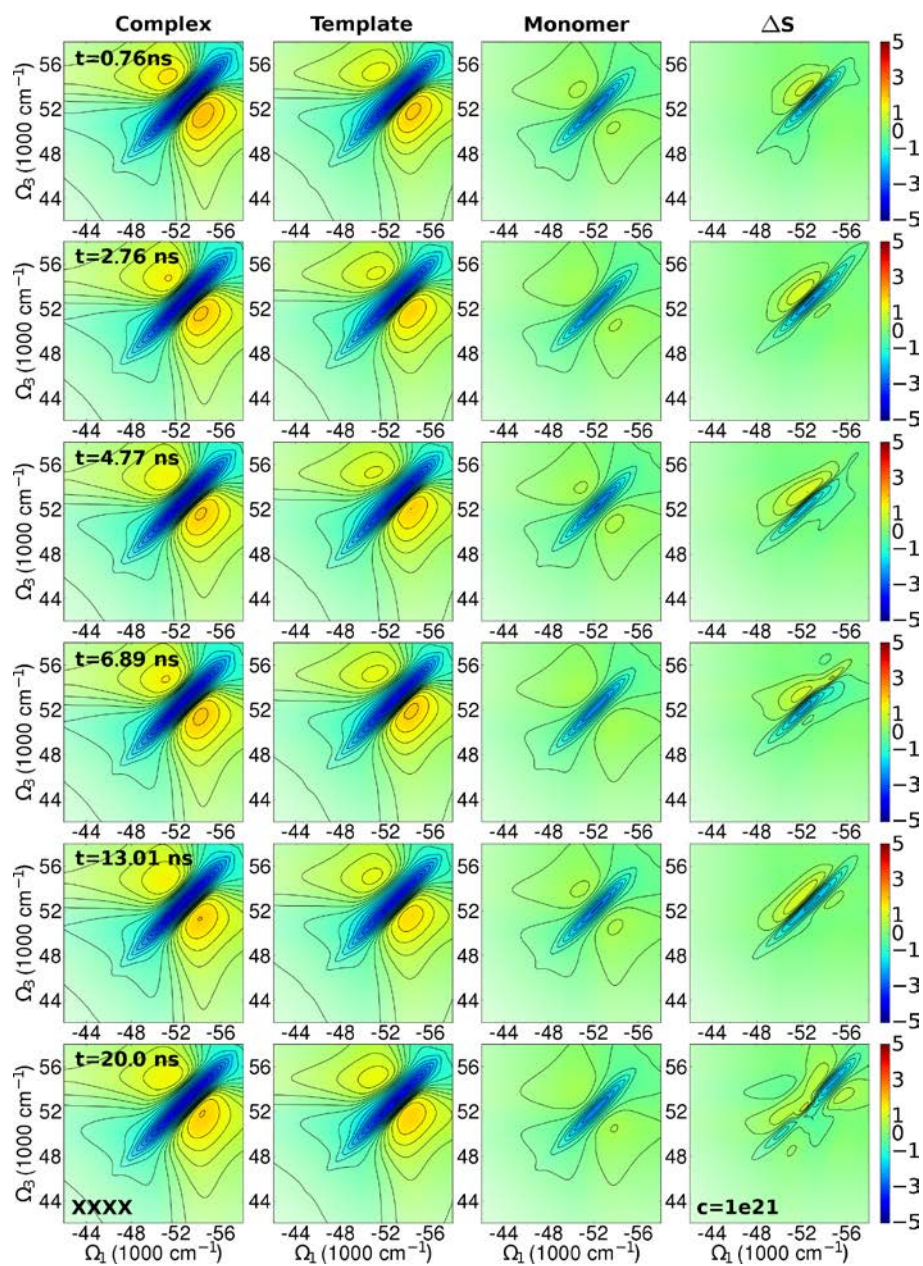

Figure S5:

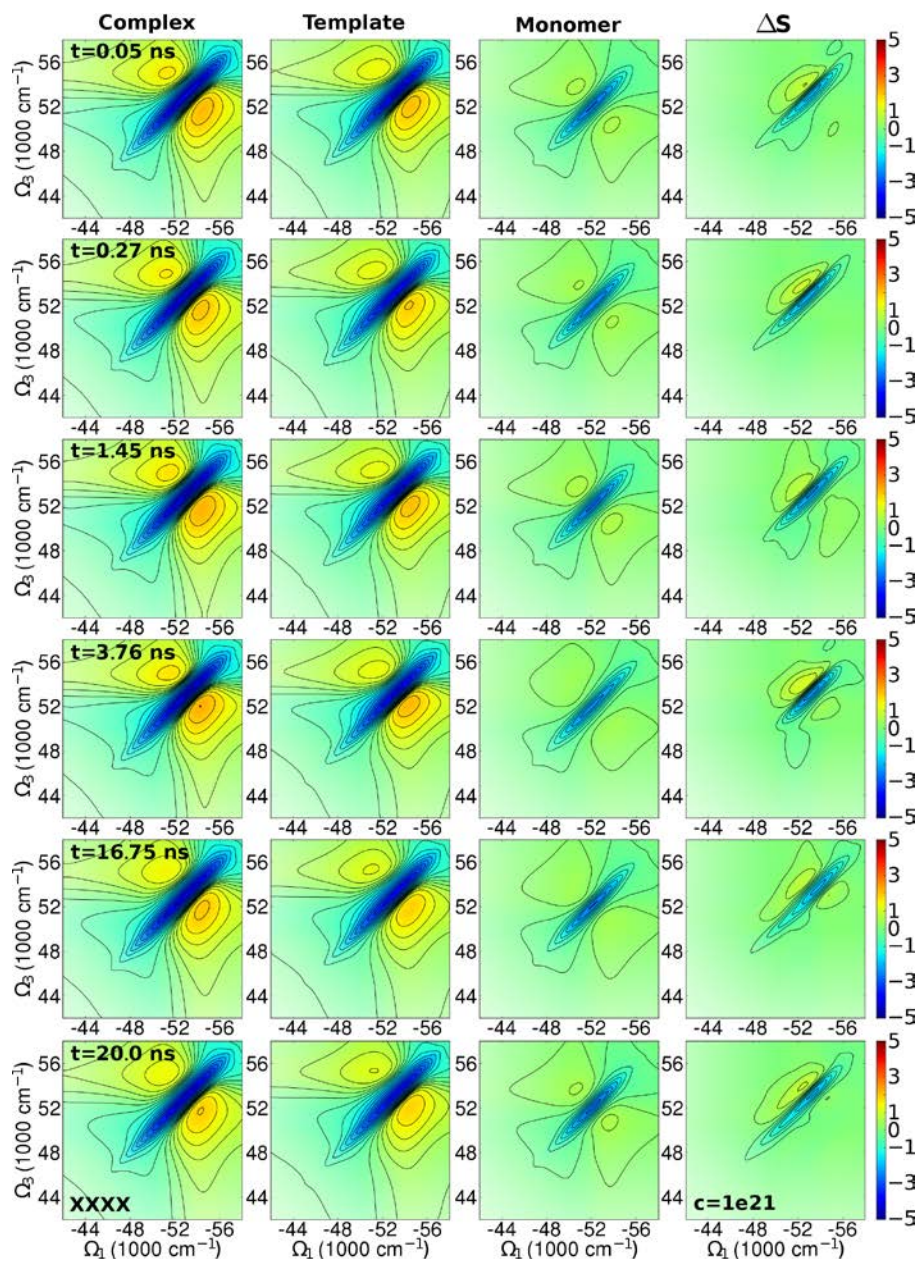

## References

- (1) Rojas, A.; Liwo, A.; Browne, D.; Scheraga, H. A. *J. Mol. Biol.* **2010**, *404*, 537-552
- (2) Zhuang, W.; Sgourakis, N. K.; Zhenyu, L.; Garcia, A.; Mukamel, S. *Proc. Natl. Acad. Sci. USA* **2010**, *107*, 15687-15692.
